# Supplementary material
Source: PubMed Central journal article supplement (PMC7488930)
Supplement: sj-pdf-1-jrs-10.1177_0141076820918238.pdf [file sj-pdf-1-jrs-10.1177_0141076820918238.pdf]

**Supplementary Table 1: List of drugs excluded from analysis after screening (*n* = 248)**

| <b>Ingredient</b>                     | <b>Generic Available</b> | <b>Not in US</b> |
|---------------------------------------|--------------------------|------------------|
| Beclometasone Dipropionate            | X                        |                  |
| Fluticasone Propionate                | X                        |                  |
| Budesonide                            | X                        |                  |
| Tiotropium Bromide                    | X                        |                  |
| Colecalciferol                        | X                        |                  |
| Metformin Hydrochloride               | X                        |                  |
| Mesalazine                            | X                        |                  |
| Insulin Glargine                      | X                        |                  |
| Levothyroxine Sodium                  | X                        |                  |
| Co-Codamol (Codeine Phos/Paracetamol) | X                        |                  |
| Quetiapine                            | X                        |                  |
| Levetiracetam                         | X                        |                  |
| Salbutamol                            | X                        |                  |
| Atorvastatin                          | X                        |                  |
| Calcipotriol                          | X                        |                  |
| Buprenorphine                         | X                        |                  |
| Fentanyl                              | X                        |                  |
| Gabapentin                            | X                        |                  |
| Oxycodone Hydrochloride               | X                        |                  |
| Omeprazole                            | X                        |                  |
| Paracetamol                           | X                        |                  |
| Ramipril                              | X                        |                  |
| Ezetimibe                             | X                        |                  |
| Amlodipine                            | X                        |                  |
| Macrogol 3350                         | X                        |                  |
| Pregabalin                            | X                        |                  |
| Nitrofurantoin                        | X                        |                  |
| Lamotrigine                           | X                        |                  |
| Fluticasone Furoate                   | X                        |                  |
| Morphine Sulfate                      | X                        |                  |
| Methylphenidate Hydrochloride         | X                        |                  |
| Sumatriptan Succinate                 | X                        |                  |
| Pancreatin                            | X                        |                  |
| Sodium Valproate                      | X                        |                  |
| Melatonin                             | X                        |                  |
| Tamsulosin Hydrochloride              | X                        |                  |

|                             |   |   |
|-----------------------------|---|---|
| Hydrocortisone              | X |   |
| Somatropin                  | X |   |
| Latanoprost                 | X |   |
| Lansoprazole                | X |   |
| Venlafaxine                 | X |   |
| Olanzapine                  | X |   |
| Alogliptin                  | X |   |
| Amitriptyline Hydrochloride | X |   |
| Naproxen                    | X |   |
| Diltiazem Hydrochloride     | X |   |
| Tramadol Hydrochloride      | X |   |
| Propranolol Hydrochloride   | X |   |
| Perindopril Erbumine        | X |   |
| Liothyronine Sodium         | X |   |
| Estradiol with Progestogen  | X |   |
| Citalopram Hydrobromide     | X |   |
| Losartan Potassium          | X |   |
| Felodipine                  | X |   |
| Simvastatin                 | X |   |
| Lidocaine Hydrochloride     | X |   |
| Gliclazide                  |   | X |
| Bimatoprost                 | X |   |
| Timolol & Bimatoprost       |   | X |
| Combined Ethinylestradiol   | X |   |
| Tacrolimus                  | X |   |
| Tadalafil                   | X |   |
| Glycopyrronium Bromide      | X |   |
| Flucloxacillin Sodium       |   | X |
| Rosuvastatin Calcium        | X |   |
| Isosorbide Mononitrate      | X |   |
| Enoxaparin                  | X |   |
| Adrenaline                  | X |   |
| Betamethasone Valerate      | X |   |
| Duloxetine Hydrochloride    | X |   |
| Ropinirole Hydrochloride    | X |   |
| Methotrexate                | X |   |
| Oxybutynin                  | X |   |
| Vitamin B Compound          | X |   |
| Bisoprolol Fumarate         | X |   |

|                                       |   |   |
|---------------------------------------|---|---|
| Sertraline Hydrochloride              | X |   |
| Candesartan Cilexetil                 | X |   |
| Carbimazole                           |   | X |
| Topiramate                            | X |   |
| Salmeterol                            | X |   |
| Estradiol                             | X |   |
| Aspirin                               | X |   |
| Chlorpromazine Hydrochloride          | X |   |
| Nifedipine                            | X |   |
| Trimipramine Maleate                  | X |   |
| Carbamazepine                         | X |   |
| Desogestrel                           |   | X |
| Furosemide                            | X |   |
| Doxazosin Mesilate                    | X |   |
| Clopidogrel                           | X |   |
| Buprenorphine Hydrochloride           | X |   |
| Carbocisteine                         |   | X |
| Mirtazapine                           | X |   |
| Pramipexole                           | X |   |
| Diclofenac Sodium                     | X |   |
| Trazodone Hydrochloride               | X |   |
| Prednisolone                          | X |   |
| Clonazepam                            | X |   |
| Triptorelin Acetate                   |   | X |
| Ethosuximide                          | X |   |
| Mefenamic Acid                        | X |   |
| Ibuprofen                             | X |   |
| Phenoxyethylpenicillin (Penicillin V) | X |   |
| Fluoxetine Hydrochloride              | X |   |
| Tolterodine                           | X |   |
| Allopurinol                           | X |   |
| Ivabradine                            | X |   |
| Lacosamide*                           |   |   |
| Desmopressin Acetate                  | X |   |
| Codeine Phosphate                     |   | X |
| Co-Careldopa (Carbidopa/Levodopa)     | X |   |
| Lercanidipine Hydrochloride           |   | X |
| Levonorgestrel                        | X |   |
| Mebeverine Hydrochloride              |   | X |

|                                          |   |   |
|------------------------------------------|---|---|
| Ferrous Fumarate                         | X |   |
| Methadone Hydrochloride                  | X |   |
| Primidone                                | X |   |
| Rizatriptan                              | X |   |
| Alimemazine Tartrate                     |   | X |
| Docusate Sodium                          | X |   |
| Nicotine                                 | X |   |
| Sodium Cromoglicate                      | X |   |
| Ursodeoxycholic Acid                     | X |   |
| Benzoyl Peroxide & Clindamycin Phosphate | X |   |
| Rivastigmine                             | X |   |
| Testosterone                             | X |   |
| Fexofenadine Hydrochloride               | X |   |
| Irbesartan                               | X |   |
| Esomeprazole                             | X |   |
| Cyanocobalamin                           | X |   |
| Zolmitriptan                             | X |   |
| Lisinopril                               | X |   |
| Tinzaparin Sodium                        |   | X |
| Dicycloverine Hydrochloride              | X |   |
| BeclometDiprop/Formoterol/Glycopyrronium |   | X |
| Indapamide                               | X |   |
| Levodopa/Carbidopa/Entacapone            | X |   |
| Amoxicillin                              | X |   |
| Warfarin Sodium                          | X |   |
| Estriol                                  |   | X |
| Ranitidine Hydrochloride                 | X |   |
| Clobazam                                 | X |   |
| Alfacalcidol                             |   | X |
| Sodium Chloride                          | X |   |
| Prochlorperazine Maleate                 | X |   |
| Sulfasalazine                            | X |   |
| Phenytoin Sodium                         | X |   |
| Orlistat                                 | X |   |
| Lymecycline                              |   | X |
| Eplerenone                               | X |   |
| Hyoscine                                 |   | X |
| Dorzolamide & Timolol                    | X |   |
| Risperidone                              | X |   |

|                                        |   |   |
|----------------------------------------|---|---|
| Terbinafine Hydrochloride              | X |   |
| Fludrocortisone Acetate                | X |   |
| Lactulose                              | X |   |
| Thiamine Hydrochloride                 | X |   |
| Aripiprazole                           | X |   |
| Atomoxetine Hydrochloride              | X |   |
| Colesevelam Hydrochloride              | X |   |
| Diazepam                               | X |   |
| Ondansetron Hydrochloride              | X |   |
| Urea                                   | X |   |
| Midazolam Hydrochloride                |   |   |
| Senna                                  | X |   |
| Colistimethate Sodium                  | X |   |
| Ferrous Sulfate                        | X |   |
| Octreotide Acetate                     | X |   |
| Loperamide Hydrochloride               | X |   |
| Mycophenolate Mofetil                  | X |   |
| Aclidinium Brom/Formoterol             |   | X |
| Galantamine                            | X |   |
| Co-Dydramol (Dihydrocodeine/Paracet)   |   | X |
| Betahistine Hydrochloride              |   | X |
| Prednisolone Sodium Metasulphobenzoate |   | X |
| Terbutaline Sulphate                   | X |   |
| Alfuzosin Hydrochloride                | X |   |
| Alprostadil                            | X |   |
| Capsaicin                              | X |   |
| Enalapril Maleate                      | X |   |
| Folic Acid                             | X |   |
| Ciclosporin                            | X |   |
| Hydroxocobalamin                       | X |   |
| Co-Beneldopa (Benserazide/Levodopa)    |   | X |
| Dihydrocodeine Tartrate                |   | X |
| Carmellose Sodium                      | X |   |
| Prucalopride                           |   | X |
| Ispaghula Husk                         | X |   |
| Memantine Hydrochloride                | X |   |
| Clobetasol Propionate                  | X |   |
| Alendronic Acid                        | X |   |
| Medroxyprogesterone Acetate            | X |   |

|                            |   |   |
|----------------------------|---|---|
| Travoprost                 | X |   |
| Haloperidol                | X |   |
| Bisacodyl                  | X |   |
| Mercaptopurine             | X |   |
| Bendroflumethiazide        |   | X |
| Atropine Sulfate           | X |   |
| Clarithromycin             | X |   |
| Multivitamin Preps         | X |   |
| Procyclidine Hydrochloride |   | X |
| Clotrimazole               | X |   |
| Amantadine Hydrochloride   | X |   |
| Doxepin                    | X |   |
| Tranexamic Acid            | X |   |
| Timolol & Travoprost       |   | X |
| Hydroxychloroquine Sulfate | X |   |
| Pioglitazone Hydrochloride | X |   |
| Cetirizine Hydrochloride   | X |   |
| Atenolol                   | X |   |
| Clobetasone Butyrate       |   | X |
| Azithromycin               | X |   |
| Fluorouracil               | X |   |
| Dexamethasone              | X |   |
| Montelukast                | X |   |
| Verapamil Hydrochloride    | X |   |
| Trospium Chloride          | X |   |
| Valsartan                  | X |   |
| Quinine Sulfate            | X |   |
| Mometasone Furoate         | X |   |
| Nicorandil                 |   | X |
| Paroxetine Hydrochloride   | X |   |
| Midodrine Hydrochloride    | X |   |
| Sildenafil                 | X |   |
| Spirolactone               | X |   |
| Lorazepam                  | X |   |
| Digoxin                    | X |   |
| Omega-3-Acid Ethyl Esters  | X |   |
| Zonisamide                 | X |   |
| Glyceryl Trinitrate        | X |   |
| Febuxostat                 | X |   |

|                                      |   |   |
|--------------------------------------|---|---|
| Formoterol Fumarate                  | X |   |
| Ipratropium Bromide                  | X |   |
| Etoricoxib                           |   | X |
| Dipyridamole                         | X |   |
| Dexamfetamine Sulfate                | X |   |
| Hypromellose                         | X |   |
| Adapalene & Benzoyl Peroxide         | X |   |
| Tranlycypromine Sulfate              | X |   |
| Brinzolamide                         | X |   |
| Finasteride                          | X |   |
| Tibolone                             |   | X |
| Flecainide Acetate                   | X |   |
| Bicalutamide                         | X |   |
| Co-Proxamol (Dextroprop HCl/Paracet) |   | X |
| Nefopam Hydrochloride                |   | X |
| Erythromycin                         | X |   |
| Bumetanide                           | X |   |

\*Note that lacosamide (Vimpat) was excluded from the analysis because multiple routes of administration were combined in the Medicare data, precluding accurate cost per unit comparisons.

**Supplementary Table 2: 2018 US spending, units, and prices for drugs included in analysis, by drug class**

| Chemical Name                           | English Brand             | US Brand                  | Total Adjusted US Spending <sup>a</sup> | Total US Units | Adjusted US Price Per Unit |
|-----------------------------------------|---------------------------|---------------------------|-----------------------------------------|----------------|----------------------------|
| <b>Non-Insulin Diabetes Medications</b> |                           |                           |                                         |                |                            |
| Sitagliptin                             | Januvia                   | Januvia                   | £1,354,373,883                          | 226,815,826    | £5.97                      |
| Linagliptin                             | Tradjenta                 | Tradjenta                 | £437,071,762                            | 76,101,691     | £5.74                      |
| Liraglutide                             | Victoza                   | Victoza                   | £704,514,958                            | 18,002,527     | £39.13                     |
| Dapagliflozin                           | Forxiga                   | Farxiga                   | £149,619,469                            | 23,136,260     | £6.47                      |
| Empagliflozin                           | Jardiance                 | Jardiance                 | £280,513,200                            | 43,343,840     | £6.47                      |
| Dulaglutide                             | Trulicity                 | Trulicity                 | £571,936,813                            | 3,746,576      | £152.66                    |
| Canagliflozin                           | Invokana                  | Invokana                  | £281,939,758                            | 43,505,156     | £6.48                      |
| Exenatide                               | Bydureon                  | Bydureon Pen              | £113,859,286                            | 1,636,500      | £69.57                     |
|                                         | Byetta                    | Byetta                    | £33,460,312                             | 239,561        | £139.67                    |
| Saxagliptin                             | Onglyza                   | Onglyza                   | £92,897,220                             | 16,242,280     | £5.72                      |
| Metformin/Sitagliptin                   | Janumet                   | Janumet                   | £290,300,430                            | 97,354,713     | £2.98                      |
| Lixisenatide                            | Lyxumia                   | Adlyxin                   | £26,596                                 | 636            | £41.82                     |
| <b>Insulin Diabetes Medications</b>     |                           |                           |                                         |                |                            |
| Insulin Aspart                          | Novorapid                 | Novolog                   | £291,196,882                            | 24,316,865     | £11.98                     |
|                                         | Novorapid FlexPen         | Novolog FlexPen           | £718,742,335                            | 47,016,576     | £15.29                     |
|                                         | Fiasp                     | Fiasp                     | £844,018                                | 71,417         | £11.82                     |
|                                         | Fiasp Flextouch           | Fiasp Flextouch           | £2,289,235                              | 147,932        | £15.47                     |
| Biphasic Insulin Aspart                 | Novomix                   | Novolog Mix 70-30         | £63,298,367                             | 5,133,749      | £12.33                     |
|                                         | Novomix Pen               | Novolog Mix 70-30 Flexpen | £195,907,939                            | 12,858,197     | £15.24                     |
| Insulin Detemir                         | Levemir                   | Levemir                   | £225,382,288                            | 18,418,092     | £12.24                     |
|                                         | Levemir Flexpen           | Levemir Flextouch         | £663,928,772                            | 54,941,914     | £12.08                     |
| Biphasic Isophane Insulin               | Humulin M3                | Humulin 70-30             | £72,104,202                             | 12,929,074     | £5.58                      |
|                                         | Humulin M3 Kwikpen        | Humulin 70/30 Kwikpen     | £38,430,780                             | 3,377,326      | £11.38                     |
| Biphasic Insulin Lispro                 | Humalog Mix 50-50         | Humalog Mix 50-50         | £5,775,686                              | 474,705        | £12.17                     |
|                                         | Humalog Mix 50-50 Kwikpen | Humalog Mix 50-50 Kwikpen | £11,741,648                             | 788,934        | £14.88                     |
|                                         | Humalog Mix 75-25         | Humalog Mix 75-25         | £49,810,131                             | 4,104,312      | £12.14                     |
|                                         | Humalog Mix 75-25 Kwikpen | Humalog Mix 75-25 Kwikpen | £131,909,274                            | 8,847,802      | £14.91                     |
| Isophane Insulin                        | Humulin I                 | Humulin N                 | £58,299,597                             | 17,036,419     | £5.58                      |



|                              |                           |                         |                |             |           |
|------------------------------|---------------------------|-------------------------|----------------|-------------|-----------|
|                              | Humulin I Kwikpen         | Humulin N Kwikpen       | £22,114,020    | 2,787,155   | £11.38    |
| Insulin Degludec             | Ins Tresiba Flextouch 100 | Tresiba Flextouch U-100 | £127,534,940   | 9,564,673   | £13.33    |
|                              | Ins Tresiba Flextouch 200 | Tresiba Flextouch U-200 | £263,946,744   | 9,910,356   | £26.63    |
| <b>Anticoagulants</b>        |                           |                         |                |             |           |
| Apixaban                     | Eliquis                   | Eliquis                 | £2,090,902,271 | 713,809,249 | £2.93     |
| Rivaroxaban                  | Xarelto                   | Xarelto                 | £1,407,201,753 | 240,480,958 | £5.85     |
| Ticagrelor                   | Brilique                  | Brilinta                | £177,465,838   | 71,790,959  | £2.48     |
| Dabigatran                   | Pradaxa                   | Pradaxa                 | £267,044,444   | 106,147,690 | £2.52     |
| Edoxaban                     | Lixiana                   | Savaysa                 | £4,112,213     | 876,240     | £4.69     |
| Dalteparin                   | Fragmin                   | Fragmin                 | £2,308,236     | 32,853      | £70.26    |
| <b>Inhalers</b>              |                           |                         |                |             |           |
| Umeclidinium                 | Incruse Ellipta           | Incruse Ellipta         | £216,055,591   | 47,075,573  | £4.59     |
| Acclidinium                  | Eklira Genuair            | Tudorza Pressair        | £15,570,533    | 7,049,820   | £2.21     |
| Indacaterol/Glycopyrronium   | Ultibro Breezhaler        | Utibron Neohaler        | £1,046,338     | 404,186     | £2.59     |
| Tiotropium/Olodaterol        | Stiolto Respimat          | Stiolto Respimat        | £70,457,559    | 54,787,500  | £1.29     |
| Umeclidinium/Vilanterol      | Anoro Ellipta             | Anoro Ellipta           | £278,908,852   | 99,404,830  | £2.81     |
| <b>Dopamine Agonists</b>     |                           |                         |                |             |           |
| Rotigotine                   | Neupro                    | Neupro                  | £37,012,923    | 4,060,093   | £9.12     |
| Apomorphine                  | APO-Go                    | Apokyn                  | £38,576,480    | 260,042     | £148.35   |
| <b>Antimuscarinic Agents</b> |                           |                         |                |             |           |
| Solifenacin                  | Vesicare                  | Vesicare                | £289,497,175   | 58,475,720  | £4.95     |
| Fesoterodine                 | Toviaz                    | Toviaz                  | £60,768,839    | 13,861,157  | £4.38     |
| <b>GnRH Analogues</b>        |                           |                         |                |             |           |
| Leuprorelin                  | Prostap                   | Lupron Depot            | £29,110,228    | 19,664      | £1,480.41 |
| Goserelin                    | Zoladex                   | Zoladex                 | £423,670       | 759         | £558.20   |
| Triptorelin                  | Salvacyl/Decapetyl        | Trelstar                | £4,311,897     | 4,521       | £953.75   |
| <b>Other Agents</b>          |                           |                         |                |             |           |
| Perampanel                   | Fycompa                   | Fycompa                 | £13,859,651    | 1,414,352   | £9.80     |
| Mirabegron                   | Betmiga                   | Myrbetriq               | £444,859,049   | 89,788,096  | £4.95     |
| Ranolazine                   | Ranexa                    | Ranexa                  | £275,778,743   | 95,010,411  | £2.90     |
| Varenicline                  | Champix                   | Chantix                 | £112,466,854   | 36,089,295  | £3.12     |
| Testosterone Undecanoate     | Nebido                    | Aveed                   | £200,132       | 1,302       | £153.71   |
| Denosumab                    | Xgeva                     | Xgeva                   | £9,868,311     | 17,506      | £563.72   |
|                              | Prolia                    | Prolia                  | £127,523,156   | 258,089     | £494.11   |

|                      |                       |                  |              |            |           |
|----------------------|-----------------------|------------------|--------------|------------|-----------|
| Etonogestrel         | Nexplanon             | Nexplanon        | £73,338      | 189        | £388.03   |
| Rifaximin            | Xifaxanta/Targaxan    | Xifaxan          | £266,863,141 | 17,427,398 | £15.31    |
| Sacubitril/Valsartan | Entresto              | Entresto         | £199,796,335 | 61,501,574 | £3.25     |
| Cinacalcet           | Mimpara               | Sensipar         | £130,108,037 | 8,759,640  | £14.85    |
| Lisdexamfetamine     | Elvance               | Vyvanse          | £29,904,521  | 7,102,317  | £4.21     |
| Tapentadol           | Palexia               | Nucynta          | £21,550,211  | 7,276,750  | £2.96     |
| Dornase Alfa         | Pulmozyme             | Pulmozyme        | £1,249,769   | 63,238     | £19.76    |
| Lanreotide           | Somatuline<br>Autogel | Somatuline Depot | £12,600,524  | 1,796      | £7,017.44 |

<sup>a</sup>All US prices and spending are reported in 2018 British pounds and account for estimated US rebates and dispensing costs.
